# Supplementary material for: Genetic Diversity and Relationships of Listeria monocytogenes Serogroup IIa Isolated in Poland
Source: MDPI journal article supplement (doi:10.3390/microorganisms10030532), 2022-02-28
Supplement: s1 [file s1]

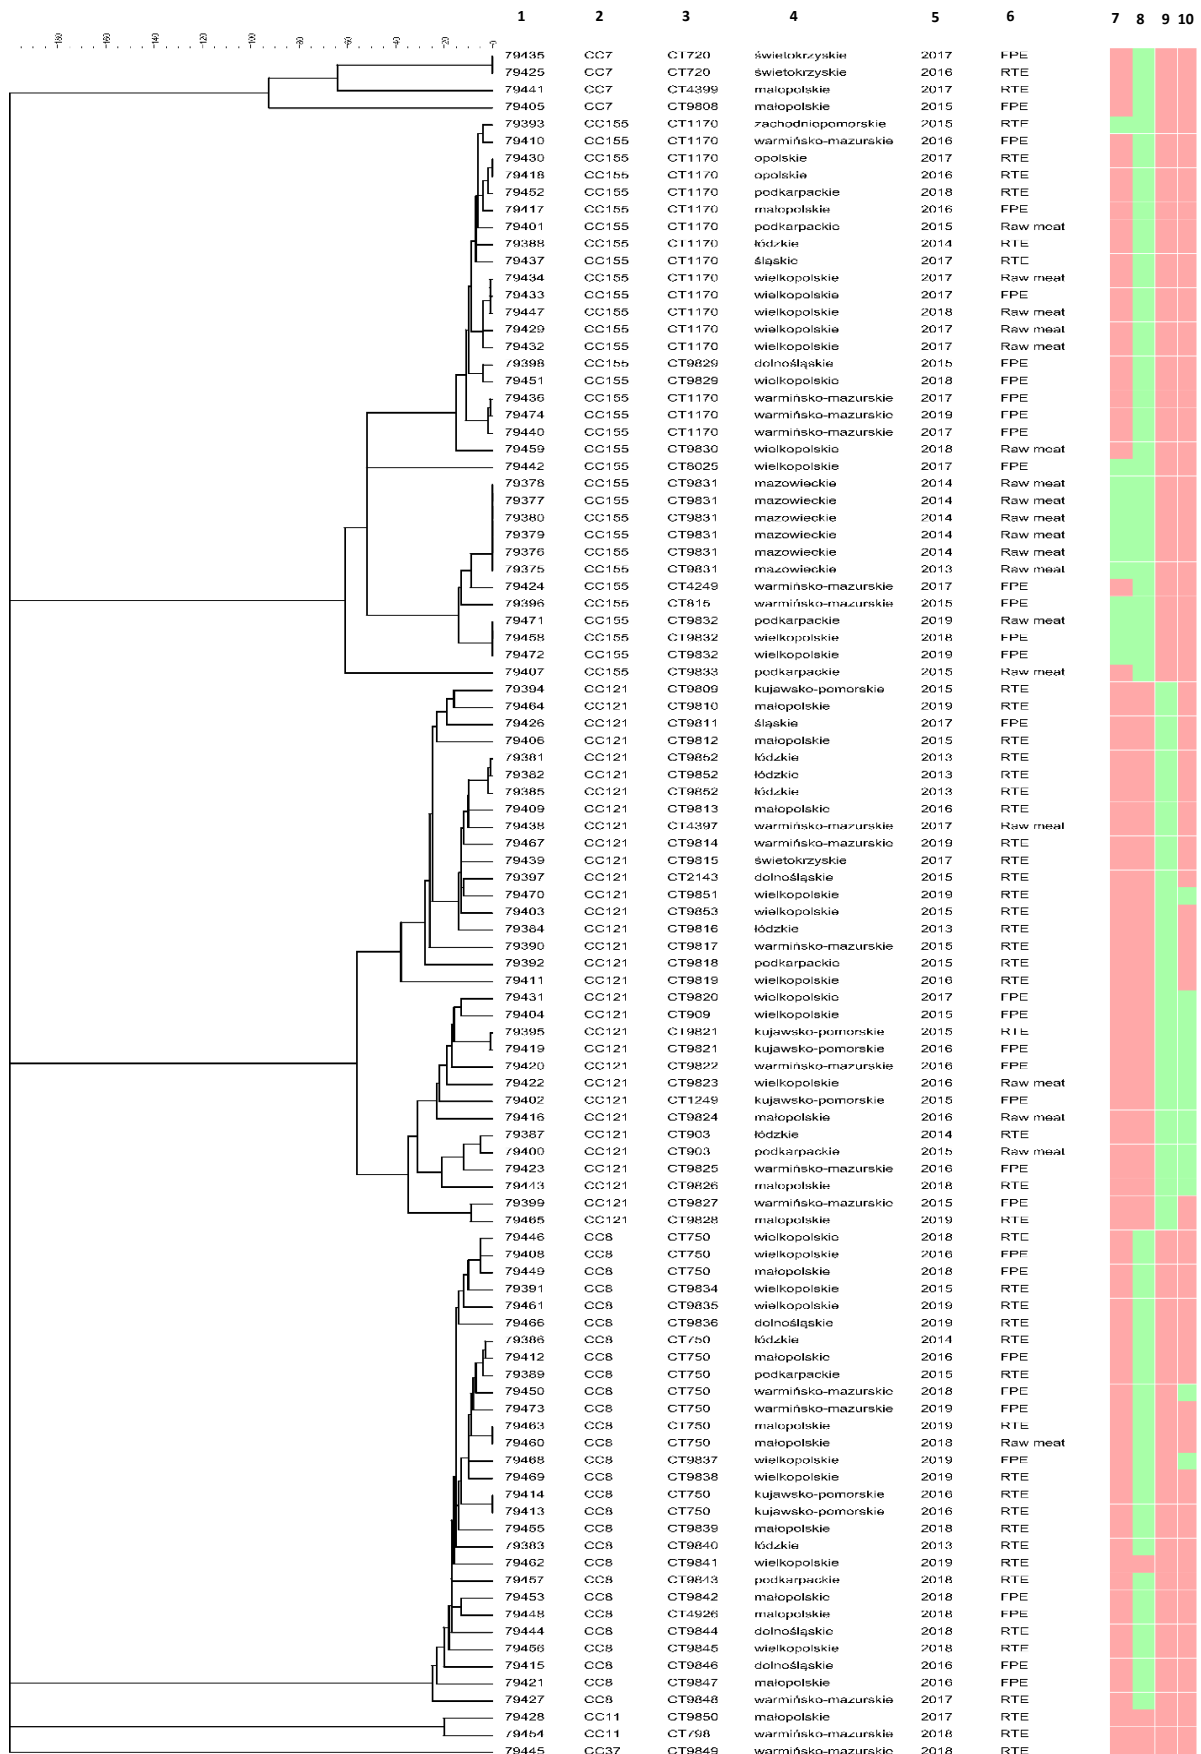

Figure S1. Phylogenetic tree of all 100 *L. monocytogenes* isolated tested based on the cgMLST analyses and prevalence of the selected genes (green – gene presence, red – gene absence). Column designations: 1. Isolate ID number, 2. Isolate CCs, 3. Isolate CTs, 4. Isolate source (voivodeship), 5. Year of isolation, 6. Isolate origin, 7. *bcrABC* genes, 8. SSI-1 genes, 9. SSI-2 genes, 10. *ermC* (*Tn6118\_qac*) gene.
