# Supplementary material for: Genetic Diversity and Relationships of Listeria monocytogenes Serogroup IIa Isolated in Poland
Source: MDPI journal article supplement (doi:10.3390/microorganisms10030532), 2022-02-28
Supplement: s1 [file s1]

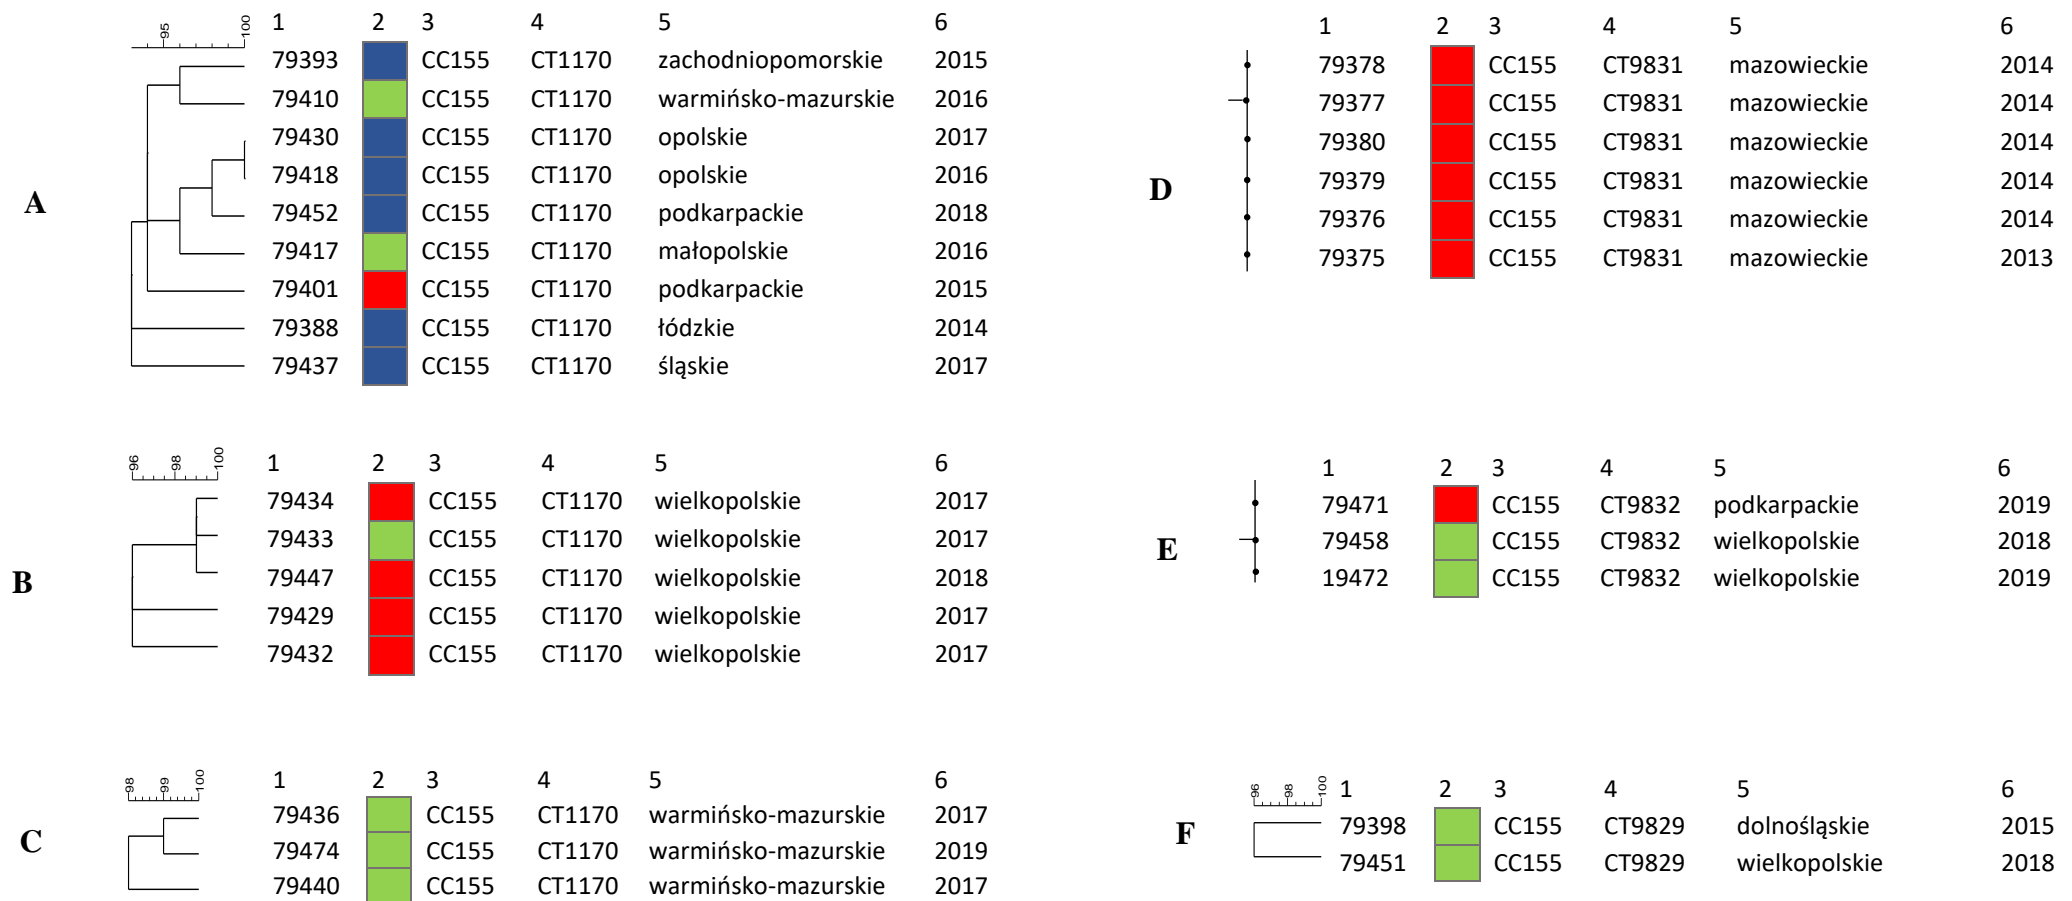

Figure S2. Comparison of *L. monocytogenes* CC155 isolates showing over 93% similarity of macrorestriction profiles obtained with the cgMLST method. Column designations: 1. Isolate number, 2. Isolate origin (blue – ready-to-eat food, green - food production environments, red – raw meat), 3. CC number, 4. CT number, 5. Isolate source (voivodeship), 6. Year of isolation.
