# Supplementary material for: Genetic Diversity and Relationships of Listeria monocytogenes Serogroup IIa Isolated in Poland
Source: Microorganisms. 2022 Feb 28;10(3):532. doi: 10.3390/microorganisms10030532 (PMC8951407; doi:10.3390/microorganisms10030532)
Supplement: Supplementary file 1 [file microorganisms-10-00532-s001.zip]

Archive with 8 entries (8 files):
- Supplementary files/Figure S1.pdf
- Supplementary files/Figure S2.pdf
- Supplementary files/Figure S3.pdf
- Supplementary files/Figure S4.pdf
- Supplementary files/Table S1. Characteristics of L. monocytogenes isolates tested..xlsx
- Supplementary files/Table S2. L. monocytogenes WGS sequence parameters..xlsx
- Supplementary files/Table S3. L. monocytogenes isolates from Poland selected for comparison wih the present strains..xlsx
- Supplementary files/Table S4. Prophages and plasmids in Listeria monocytogenes strains tested..xlsx
