# Supplementary material for: Genetic Diversity and Relationships of Listeria monocytogenes Serogroup IIa Isolated in Poland
Source: Microorganisms. 2022 Feb 28;10(3):532. doi: 10.3390/microorganisms10030532 (PMC8951407; doi:10.3390/microorganisms10030532)
Supplement: Supplementary file 1 [file microorganisms-10-00532-s001.zip › Supplementary files/Table S1. Characteristics of L. monocytogenes isolates tested..xlsx]

## Sheet: Export
Table S1. Characteristics of L. monocytogenes isolates tested.
No.	BIGSdb ID	Isolate	Isolation date	Voivodeship	Source type	Sublineage	Clonal complex	ST (MLST)	Cgmlst type	Lineage (MLST)	Serogroup (PCR-serogroup)	Virulence genes
												prfA	plcA	hly	mpl	actA	plcB	lmo0206	LIPI3_llsA	LIPI3_llsG	LIPI3_llsH	LIPI3_llsX	LIPI3_llsB	LIPI3_llsY	LIPI3_llsD	LIPI3_llsP	LM9005581_70009	LM9005581_70010	LM9005581_70011	LM9005581_70012	LM9005581_70013	LM9005581_70014	inlA	inlB	inlC	inlE	inlF	inlG	inlH	lmo0333	inlJ	inlK	lmo2470	inlP1	inlP3	inlP4	gltA	gltB	tagB
1	79375	1	2013	mazowieckie	Raw meat	SL155	CC155	ST155	CT9831	II	IIa	1	1	1	1	1	1	1	0	0	0	0	0	0	0	0	0	0	0	0	0	0	1	1	1	1	1	1	1	1	1	1	1	0	0	0	0	0	1
2	79376	2	2014	mazowieckie	Raw meat	SL155	CC155	ST155	CT9831	II	IIa	1	1	1	1	1	1	1	0	0	0	0	0	0	0	0	0	0	0	0	0	0	1	1	1	1	1	1	1	1	1	1	1	0	0	0	0	0	1
3	79377	4	2014	mazowieckie	Raw meat	SL155	CC155	ST155	CT9831	II	IIa	1	1	1	1	1	1	1	0	0	0	0	0	0	0	0	0	0	0	0	0	0	1	1	1	1	1	1	1	1	1	1	1	0	0	0	0	0	1
4	79378	5	2014	mazowieckie	Raw meat	SL155	CC155	ST155	CT9831	II	IIa	1	1	1	1	1	1	1	0	0	0	0	0	0	0	0	0	0	0	0	0	0	1	1	1	1	1	1	1	1	1	1	1	0	0	0	0	0	1
5	79379	6	2014	mazowieckie	Raw meat	SL155	CC155	ST155	CT9831	II	IIa	1	1	1	1	1	1	1	0	0	0	0	0	0	0	0	0	0	0	0	0	0	1	1	1	1	1	1	1	1	1	1	1	0	0	0	0	0	1
6	79380	7	2014	mazowieckie	Raw meat	SL155	CC155	ST155	CT9831	II	IIa	1	1	1	1	1	1	1	0	0	0	0	0	0	0	0	0	0	0	0	0	0	1	1	1	1	1	1	1	1	1	1	1	0	0	0	0	0	1
7	79381	11	2013	łódzkie	RTE	SL121	CC121	ST121	CT9852	II	IIa	1	1	1	1	1	1	1	0	0	0	0	0	0	0	0	0	0	0	0	0	0	PMSC	1	1	1	0	0	1	1	1	1	1	0	0	0	0	0	1
8	79382	12	2013	łódzkie	RTE	SL121	CC121	ST121	CT9852	II	IIa	1	1	1	1	1	1	1	0	0	0	0	0	0	0	0	0	0	0	0	0	0	PMSC	1	1	1	0	0	1	1	1	1	0	0	0	0	0	0	1
9	79383	20	2013	łódzkie	RTE	SL8	CC8	ST8	CT9840	II	IIa	1	1	1	1	1	1	1	0	0	0	0	0	0	0	0	0	0	0	0	0	0	1	1	1	1	1	1	1	1	1	1	1	0	0	0	0	0	1
10	79384	21	2013	łódzkie	RTE	SL121	CC121	ST121	CT9816	II	IIa	1	1	1	1	1	1	1	0	0	0	0	0	0	0	0	0	0	0	0	0	0	PMSC	1	1	1	0	0	1	1	1	1	1	0	0	0	0	0	1
11	79385	22	2013	łódzkie	RTE	SL121	CC121	ST121	CT9852	II	IIa	1	1	1	1	1	1	1	0	0	0	0	0	0	0	0	0	0	0	0	0	0	PMSC	1	1	1	0	0	1	1	1	1	0	0	0	0	0	0	1
12	79386	41	2014	łódzkie	RTE	SL8	CC8	ST8	CT750	II	IIa	1	1	1	1	1	1	1	0	0	0	0	0	0	0	0	0	0	0	0	0	0	1	1	1	1	1	1	1	1	1	1	1	0	0	0	0	0	1
13	79387	54	2014	łódzkie	RTE	SL121	CC121	ST121	CT903	II	IIa	1	1	1	1	1	1	1	0	0	0	0	0	0	0	0	0	0	0	0	0	0	PMSC	1	1	1	0	0	1	1	1	1	1	0	0	0	0	0	1
14	79388	55	2014	łódzkie	RTE	SL155	CC155	ST155	CT1170	II	IIa	1	1	1	1	1	1	1	0	0	0	0	0	0	0	0	0	0	0	0	0	0	1	1	1	1	1	1	1	1	1	1	0	0	0	0	0	0	1
15	79389	86	2015	podkarpackie	RTE	SL8	CC8	ST8	CT750	II	IIa	1	1	1	1	1	1	1	0	0	0	0	0	0	0	0	0	0	0	0	0	0	1	1	1	1	1	1	1	1	1	1	1	0	0	0	0	0	1
16	79390	91	2015	warmińsko-mazurskie	RTE	SL121	CC121	ST1398	CT9817	II	IIa	1	1	1	1	1	1	1	0	0	0	0	0	0	0	0	0	0	0	0	0	0	PMSC	1	1	1	0	0	1	1	1	1	1	0	0	0	0	0	1
17	79391	93	2015	wielkopolskie	RTE	SL8	CC8	ST8	CT9834	II	IIa	1	1	1	1	1	1	1	0	0	0	0	0	0	0	0	0	0	0	0	0	0	1	1	1	1	1	1	1	1	1	1	1	0	0	0	0	0	1
18	79392	95	2015	podkarpackie	RTE	SL121	CC121	ST121	CT9818	II	IIa	1	1	1	1	1	1	1	0	0	0	0	0	0	0	0	0	0	0	0	0	0	PMSC	1	1	1	0	0	1	1	1	1	1	0	0	0	0	0	1
19	79393	96	2015	zachodniopomorskie	RTE	SL155	CC155	ST155	CT1170	II	IIa	1	1	1	1	1	1	1	0	0	0	0	0	0	0	0	0	0	0	0	0	0	1	1	1	1	1	1	1	1	1	1	1	0	0	0	0	0	1
20	79394	102	2015	kujawsko-pomorskie	RTE	SL121	CC121	ST121	CT9809	II	IIa	1	0	1	0	1	1	1	0	0	0	0	0	0	0	0	0	0	0	0	0	0	PMSC	1	1	1	0	0	1	1	1	1	1	0	0	0	0	0	1
21	79395	105	2015	kujawsko-pomorskie	RTE	SL121	CC121	ST121	CT9821	II	IIa	1	1	1	1	1	1	1	0	0	0	0	0	0	0	0	0	0	0	0	0	0	PMSC	1	1	1	0	0	1	1	1	1	1	0	0	0	0	0	1
22	79396	126	2015	warmińsko-mazurskie	FPEs	SL155	CC155	ST155	CT815	II	IIa	1	1	1	1	1	1	1	0	0	0	0	0	0	0	0	0	0	0	0	0	0	1	1	1	1	1	1	1	1	1	1	1	0	0	0	0	0	1
23	79397	130	2015	dolnośląskie	RTE	SL121	CC121	ST121	CT2143	II	IIa	1	1	1	1	1	1	1	0	0	0	0	0	0	0	0	0	0	0	0	0	0	PMSC	1	1	1	0	0	1	1	1	1	1	0	0	0	0	0	1
24	79398	133	2015	dolnośląskie	FPEs	SL155	CC155	ST155	CT9829	II	IIa	1	1	1	1	1	1	1	0	0	0	0	0	0	0	0	0	0	0	0	0	0	1	1	1	1	1	1	1	1	1	1	1	0	0	0	0	0	1
25	79399	167	2015	warmińsko-mazurskie	FPEs	SL121	CC121	ST121	CT9827	II	IIa	1	1	1	1	1	1	1	0	0	0	0	0	0	0	0	0	0	0	0	0	0	PMSC	1	1	1	0	0	1	1	1	1	1	0	0	0	0	0	1
26	79400	168	2015	podkarpackie	Raw meat	SL121	CC121	ST121	CT903	II	IIa	1	1	1	1	1	1	1	0	0	0	0	0	0	0	0	0	0	0	0	0	0	PMSC	1	1	1	0	0	1	1	1	1	1	0	0	0	0	0	1
27	79401	180	2015	podkarpackie	Raw meat	SL155	CC155	ST155	CT1170	II	IIa	1	1	1	1	1	1	1	0	0	0	0	0	0	0	0	0	0	0	0	0	0	1	1	1	1	1	1	1	1	1	1	1	0	0	0	0	0	1
28	79402	192	2015	kujawsko-pomorskie	FPEs	SL121	CC121	ST121	CT1249	II	IIa	1	1	1	1	1	1	1	0	0	0	0	0	0	0	0	0	0	0	0	0	0	PMSC	1	1	1	0	0	1	1	1	1	1	0	0	0	0	0	1
29	79403	212	2015	wielkopolskie	RTE	SL121	CC121	ST121	CT9853	II	IIa	1	1	1	1	1	1	1	0	0	0	0	0	0	0	0	0	0	0	0	0	0	PMSC	1	1	1	0	0	1	1	1	1	1	0	0	0	0	0	1
30	79404	217	2015	wielkopolskie	FPEs	SL121	CC121	ST121	CT909	II	IIa	1	1	1	1	1	1	1	0	0	0	0	0	0	0	0	0	0	0	0	0	0	PMSC	1	1	1	0	0	1	1	1	1	1	0	0	0	0	0	1
31	79405	229	2015	małopolskie	FPEs	SL7	CC7	ST7	CT9808	II	IIa	1	1	1	1	1	1	1	0	0	0	0	0	0	0	0	0	0	0	0	0	0	1	1	1	1	1	1	1	0	1	1	1	0	0	0	0	0	1
32	79406	237	2015	małopolskie	RTE	SL121	CC121	ST1398	CT9812	II	IIa	1	1	1	1	1	1	1	0	0	0	0	0	0	0	0	0	0	0	0	0	0	PMSC	1	1	1	0	0	1	1	1	1	1	0	0	0	0	0	1
33	79407	312	2015	podkarpackie	Raw meat	SL155	CC155	ST155	CT9833	II	IIa	1	1	1	1	1	1	1	0	0	0	0	0	0	0	0	0	0	0	0	0	0	1	1	1	1	1	1	1	1	1	1	1	0	0	0	0	0	1
34	79408	349	2016	wielkopolskie	FPEs	SL8	CC8	ST8	CT750	II	IIa	1	1	1	1	1	1	1	0	0	0	0	0	0	0	0	0	0	0	0	0	0	1	1	1	1	1	1	1	1	1	1	1	0	0	0	0	0	1
35	79409	369	2016	małopolskie	RTE	SL121	CC121	ST121	CT9813	II	IIa	1	1	1	1	1	1	1	0	0	0	0	0	0	0	0	0	0	0	0	0	0	PMSC	1	1	1	0	0	1	1	1	1	1	0	0	0	0	0	1
36	79410	374	2016	warmińsko-mazurskie	FPEs	SL155	CC155	ST155	CT1170	II	IIa	1	1	1	1	1	1	1	0	0	0	0	0	0	0	0	0	0	0	0	0	0	1	1	1	1	1	1	1	1	1	1	1	0	0	0	0	0	1
37	79411	386	2016	wielkopolskie	RTE	SL121	CC121	ST121	CT9819	II	IIa	1	1	1	1	1	1	1	0	0	0	0	0	0	0	0	0	0	0	0	0	0	PMSC	1	1	1	0	0	1	1	1	1	1	0	0	0	0	0	0
38	79412	399	2016	małopolskie	FPEs	SL8	CC8	ST8	CT750	II	IIa	1	1	1	1	1	1	1	0	0	0	0	0	0	0	0	0	0	0	0	0	0	1	1	1	1	1	1	1	1	1	1	1	0	0	0	0	0	1
39	79413	421	2016	kujawsko-pomorskie	RTE	SL8	CC8	ST8	CT750	II	IIa	1	1	1	1	1	1	1	0	0	0	0	0	0	0	0	0	0	0	0	0	0	1	1	1	1	1	1	1	1	1	1	1	0	0	0	0	0	1
40	79414	422	2016	kujawsko-pomorskie	RTE	SL8	CC8	ST8	CT750	II	IIa	1	1	1	1	1	1	1	0	0	0	0	0	0	0	0	0	0	0	0	0	0	1	1	1	1	1	1	1	1	1	1	1	0	0	0	0	0	1
41	79415	441	2016	dolnośląskie	FPEs	SL8	CC8	ST8	CT9846	II	IIa	1	1	1	1	1	1	1	0	0	0	0	0	0	0	0	0	0	0	0	0	0	1	1	1	1	1	1	1	1	0	1	1	0	0	0	0	0	1
42	79416	469	2016	małopolskie	Raw meat	SL121	CC121	ST121	CT9824	II	IIa	1	1	1	1	1	1	1	0	0	0	0	0	0	0	0	0	0	0	0	0	0	PMSC	1	1	1	0	0	1	1	1	1	1	0	0	0	0	0	1
43	79417	472	2016	małopolskie	FPEs	SL155	CC155	ST155	CT1170	II	IIa	1	1	1	1	1	1	1	0	0	0	0	0	0	0	0	0	0	0	0	0	0	1	1	1	1	1	1	1	1	1	1	1	0	0	0	0	0	1
44	79418	476	2016	opolskie	RTE	SL155	CC155	ST155	CT1170	II	IIa	1	1	1	1	1	1	1	0	0	0	0	0	0	0	0	0	0	0	0	0	0	1	1	1	1	1	1	1	1	1	1	1	0	0	0	0	0	1
45	79419	484	2016	kujawsko-pomorskie	FPEs	SL121	CC121	ST121	CT9821	II	IIa	1	1	1	1	1	1	1	0	0	0	0	0	0	0	0	0	0	0	0	0	0	PMSC	1	1	1	0	0	1	1	1	1	1	0	0	0	0	0	1
46	79420	558	2016	warmińsko-mazurskie	FPEs	SL121	CC121	ST121	CT9822	II	IIa	1	1	1	1	1	1	1	0	0	0	0	0	0	0	0	0	0	0	0	0	0	PMSC	1	1	1	0	0	1	1	1	1	1	0	0	0	0	0	1
47	79421	643	2016	małopolskie	FPEs	SL8	CC8	ST8	CT9847	II	IIa	1	1	1	1	1	1	1	0	0	0	0	0	0	0	0	0	0	0	0	0	0	1	1	1	1	1	1	1	1	1	1	1	0	0	0	0	0	1
48	79422	700	2016	wielkopolskie	Raw meat	SL121	CC121	ST121	CT9823	II	IIa	1	1	1	1	1	1	1	0	0	0	0	0	0	0	0	0	0	0	0	0	0	PMSC	1	1	1	0	0	1	1	1	1	1	0	0	0	0	0	1
49	79423	708	2016	warmińsko-mazurskie	FPEs	SL121	CC121	ST121	CT9825	II	IIa	1	1	1	1	1	1	1	0	0	0	0	0	0	0	0	0	0	0	0	0	0	PMSC	1	1	1	0	0	1	1	1	1	1	0	0	0	0	0	1
50	79424	712	2017	warmińsko-mazurskie	FPEs	SL155	CC155	ST155	CT4249	II	IIa	1	1	1	1	1	1	1	0	0	0	0	0	0	0	0	0	0	0	0	0	0	1	1	1	1	1	1	1	1	1	1	1	0	0	0	0	0	1
51	79425	722	2016	świetokrzyskie	RTE	SL7	CC7	ST12	CT720	II	IIa	1	1	1	1	1	1	1	0	0	0	0	0	0	0	0	0	0	0	0	0	0	1	1	1	1	1	1	1	1	1	1	1	0	0	0	0	0	1
52	79426	724	2017	śląskie	FPEs	SL121	CC121	ST121	CT9811	II	IIa	1	0	1	1	1	1	1	0	0	0	0	0	0	0	0	0	0	0	0	0	0	PMSC	1	1	1	0	0	1	1	1	1	1	0	0	0	0	0	1
53	79427	754	2017	warmińsko-mazurskie	RTE	SL8	CC8	ST8	CT9848	II	IIa	1	1	1	0	1	1	1	0	0	0	0	0	0	0	0	0	0	0	0	0	0	1	1	1	1	1	1	1	1	1	1	1	0	0	0	0	0	1
54	79428	756	2017	małopolskie	RTE	SL451	CC11	ST451	CT9850	II	IIa	1	1	1	1	1	1	1	0	0	0	0	0	0	0	0	0	0	0	0	0	0	1	1	1	1	1	1	1	1	1	1	1	0	0	0	0	0	1
55	79429	768	2017	wielkopolskie	Raw meat	SL155	CC155	ST155	CT1170	II	IIa	1	1	1	1	1	1	1	0	0	0	0	0	0	0	0	0	0	0	0	0	0	1	1	1	1	1	1	1	1	1	1	1	0	0	0	0	0	1
56	79430	776	2017	opolskie	RTE	SL155	CC155	ST155	CT1170	II	IIa	1	1	1	1	1	1	1	0	0	0	0	0	0	0	0	0	0	0	0	0	0	1	1	1	1	1	1	1	1	1	1	1	0	0	0	0	0	1
57	79431	792	2017	wielkopolskie	FPEs	SL121	CC121	ST121	CT9820	II	IIa	1	1	1	1	1	1	1	0	0	0	0	0	0	0	0	0	0	0	0	0	0	PMSC	1	1	1	0	0	1	1	1	1	1	0	0	0	0	0	1
58	79432	810	2017	wielkopolskie	Raw meat	SL155	CC155	ST155	CT1170	II	IIa	1	1	1	1	1	1	1	0	0	0	0	0	0	0	0	0	0	0	0	0	0	1	1	1	1	1	1	1	1	1	1	1	0	0	0	0	0	1
59	79433	812	2017	wielkopolskie	FPEs	SL155	CC155	ST155	CT1170	II	IIa	1	1	1	1	1	1	1	0	0	0	0	0	0	0	0	0	0	0	0	0	0	1	1	1	1	1	1	1	1	1	1	1	0	0	0	0	0	1
60	79434	813	2017	wielkopolskie	Raw meat	SL155	CC155	ST155	CT1170	II	IIa	1	1	1	1	1	1	1	0	0	0	0	0	0	0	0	0	0	0	0	0	0	1	1	1	1	1	1	1	1	1	1	1	0	0	0	0	0	1
61	79435	826	2017	świetokrzyskie	FPEs	SL7	CC7	ST12	CT720	II	IIa	1	1	1	1	1	1	1	0	0	0	0	0	0	0	0	0	0	0	0	0	0	1	1	1	1	1	1	1	1	1	1	1	0	0	0	0	0	1
62	79436	830	2017	warmińsko-mazurskie	FPEs	SL155	CC155	ST155	CT1170	II	IIa	1	1	1	1	1	1	1	0	0	0	0	0	0	0	0	0	0	0	0	0	0	1	1	1	1	1	1	1	1	1	1	1	0	0	0	0	0	1
63	79437	848	2017	śląskie	RTE	SL155	CC155	ST155	CT1170	II	IIa	1	1	1	1	1	1	1	0	0	0	0	0	0	0	0	0	0	0	0	0	0	1	1	1	1	1	1	1	1	1	1	1	0	0	0	0	0	1
64	79438	874	2017	warmińsko-mazurskie	Raw meat	SL121	CC121	ST121	CT4397	II	IIa	1	1	1	1	1	1	1	0	0	0	0	0	0	0	0	0	0	0	0	0	0	PMSC	1	1	1	0	0	1	1	1	1	1	0	0	0	0	0	1
65	79439	884	2017	świetokrzyskie	RTE	SL121	CC121	ST121	CT9815	II	IIa	1	1	1	1	1	1	1	0	0	0	0	0	0	0	0	0	0	0	0	0	0	PMSC	1	1	1	0	0	1	1	1	1	1	0	0	0	0	0	1
66	79440	888	2017	warmińsko-mazurskie	FPEs	SL155	CC155	ST155	CT1170	II	IIa	1	1	1	1	1	1	1	0	0	0	0	0	0	0	0	0	0	0	0	0	0	1	1	1	1	1	1	1	1	1	1	1	0	0	0	0	0	1
67	79441	900	2017	małopolskie	RTE	SL7	CC7	ST7	CT4399	II	IIa	1	1	1	1	1	1	1	0	0	0	0	0	0	0	0	0	0	0	0	0	0	1	1	1	1	1	1	1	1	1	1	1	0	0	0	0	0	1
68	79442	909	2017	wielkopolskie	FPEs	SL155	CC155	ST155	CT8025	II	IIa	1	1	1	1	1	1	1	0	0	0	0	0	0	0	0	0	0	0	0	0	0	1	1	1	1	1	1	1	1	1	1	1	0	0	0	0	0	1
69	79443	979	2018	małopolskie	RTE	SL121	CC121	ST121	CT9826	II	IIa	1	1	1	1	1	1	1	0	0	0	0	0	0	0	0	0	0	0	0	0	0	PMSC	1	1	1	0	0	1	1	1	1	1	0	0	0	0	0	1
70	79444	989	2018	dolnośląskie	RTE	SL8	CC8	ST8	CT9844	II	IIa	1	1	1	1	1	1	1	0	0	0	0	0	0	0	0	0	0	0	0	0	0	1	1	1	1	1	1	1	1	1	1	1	0	0	0	0	0	1
71	79445	993	2018	warmińsko-mazurskie	RTE	SL37	CC37	ST37	CT9849	II	IIa	1	1	1	1	1	1	1	0	0	0	0	0	0	0	0	0	0	0	0	0	0	1	1	1	1	1	1	1	1	1	1	1	0	0	0	0	0	1
72	79446	1015	2018	wielkopolskie	RTE	SL8	CC8	ST8	CT750	II	IIa	1	1	1	1	1	1	1	0	0	0	0	0	0	0	0	0	0	0	0	0	0	1	1	1	1	1	1	1	1	1	1	1	0	0	0	0	0	1
73	79447	1024	2018	wielkopolskie	Raw meat	SL155	CC155	ST155	CT1170	II	IIa	1	1	1	1	1	1	1	0	0	0	0	0	0	0	0	0	0	0	0	0	0	1	1	1	1	1	1	1	1	1	1	1	0	0	0	0	0	1
74	79448	1031	2018	małopolskie	FPEs	SL8	CC8	ST8	CT4926	II	IIa	1	1	1	1	1	1	1	0	0	0	0	0	0	0	0	0	0	0	0	0	0	1	1	1	1	1	1	1	0	1	1	1	0	0	0	0	0	1
75	79449	1032	2018	małopolskie	FPEs	SL8	CC8	ST8	CT750	II	IIa	1	1	1	1	1	1	1	0	0	0	0	0	0	0	0	0	0	0	0	0	0	1	1	1	1	1	1	1	1	1	1	1	0	0	0	0	0	1
76	79450	1038	2018	warmińsko-mazurskie	FPEs	SL8	CC8	ST8	CT750	II	IIa	1	1	1	1	1	1	1	0	0	0	0	0	0	0	0	0	0	0	0	0	0	1	1	1	1	1	1	1	1	1	1	1	0	0	0	0	0	1
77	79451	1047	2018	wielkopolskie	FPEs	SL155	CC155	ST155	CT9829	II	IIa	1	1	1	1	1	1	1	0	0	0	0	0	0	0	0	0	0	0	0	0	0	1	1	1	1	1	1	1	1	1	1	1	0	0	0	0	0	1
78	79452	1070	2018	podkarpackie	RTE	SL155	CC155	ST155	CT1170	II	IIa	1	1	1	1	1	1	1	0	0	0	0	0	0	0	0	0	0	0	0	0	0	1	1	1	1	1	1	1	1	1	1	1	0	0	0	0	0	1
79	79453	1111	2018	małopolskie	FPEs	SL8	CC8	ST8	CT9842	II	IIa	1	1	1	1	1	1	1	0	0	0	0	0	0	0	0	0	0	0	0	0	0	1	1	1	1	1	1	1	0	1	1	1	0	0	0	0	0	1
80	79454	1218	2018	warmińsko-mazurskie	RTE	SL451	CC11	ST451	CT798	II	IIa	1	1	1	1	1	1	1	0	0	0	0	0	0	0	0	0	0	0	0	0	0	1	1	1	1	1	1	1	1	1	1	1	0	0	0	0	0	1
81	79455	1243	2018	małopolskie	RTE	SL8	CC8	ST8	CT9839	II	IIa	1	1	1	1	1	1	1	0	0	0	0	0	0	0	0	0	0	0	0	0	0	1	1	1	1	1	1	1	1	1	1	1	0	0	0	0	0	1
82	79456	1280	2018	wielkopolskie	RTE	SL8	CC8	ST8	CT9845	II	IIa	1	1	1	1	1	1	1	0	0	0	0	0	0	0	0	0	0	0	0	0	0	1	1	1	1	1	1	1	1	1	1	1	0	0	0	0	0	1
83	79457	1294	2018	podkarpackie	RTE	SL8	CC8	ST8	CT9843	II	IIa	1	1	1	1	1	1	1	0	0	0	0	0	0	0	0	0	0	0	0	0	0	0	1	1	1	1	1	1	1	1	1	1	0	0	0	0	0	1
84	79458	1302	2018	wielkopolskie	FPEs	SL155	CC155	ST155	CT9832	II	IIa	1	1	1	1	1	1	1	0	0	0	0	0	0	0	0	0	0	0	0	0	0	1	1	1	1	1	1	1	1	1	1	1	0	0	0	0	0	1
85	79459	1328	2018	wielkopolskie	Raw meat	SL155	CC155	ST155	CT9830	II	IIa	1	1	1	1	1	1	1	0	0	0	0	0	0	0	0	0	0	0	0	0	0	1	1	1	1	1	1	1	1	1	1	1	0	0	0	0	0	1
86	79460	1331	2018	małopolskie	Raw meat	SL8	CC8	ST8	CT750	II	IIa	1	1	1	1	1	1	1	0	0	0	0	0	0	0	0	0	0	0	0	0	0	1	1	1	1	1	1	1	1	1	1	1	0	0	0	0	0	1
87	79461	1340	2019	wielkopolskie	RTE	SL8	CC8	ST8	CT9835	II	IIa	1	1	1	1	1	1	1	0	0	0	0	0	0	0	0	0	0	0	0	0	0	1	1	1	1	1	1	1	1	1	1	1	0	0	0	0	0	1
88	79462	1342	2019	wielkopolskie	RTE	SL8	CC8	ST8	CT9841	II	IIa	1	1	1	1	1	1	1	0	0	0	0	0	0	0	0	0	0	0	0	0	0	1	1	1	1	1	1	1	1	1	1	1	0	0	0	0	0	1
89	79463	1345	2019	małopolskie	RTE	SL8	CC8	ST8	CT750	II	IIa	1	1	1	1	1	1	1	0	0	0	0	0	0	0	0	0	0	0	0	0	0	1	1	1	1	1	1	1	1	1	1	1	0	0	0	0	0	1
90	79464	1354	2019	małopolskie	RTE	SL121	CC121	ST121	CT9810	II	IIa	1	0	1	1	1	1	1	0	0	0	0	0	0	0	0	0	0	0	0	0	0	PMSC	1	1	1	0	0	1	1	1	1	1	0	0	0	0	0	1
91	79465	1374	2019	małopolskie	RTE	SL121	CC121	ST121	CT9828	II	IIa	1	1	1	1	1	1	1	0	0	0	0	0	0	0	0	0	0	0	0	0	0	0	1	1	1	0	0	1	1	1	1	1	0	0	0	0	0	1
92	79466	1377	2019	dolnośląskie	RTE	SL8	CC8	ST8	CT9836	II	IIa	1	1	1	1	1	1	1	0	0	0	0	0	0	0	0	0	0	0	0	0	0	1	1	1	1	1	1	1	1	1	1	1	0	0	0	0	0	1
93	79467	1378	2019	warmińsko-mazurskie	RTE	SL121	CC121	ST121	CT9814	II	IIa	1	1	1	1	1	1	1	0	0	0	0	0	0	0	0	0	0	0	0	0	0	PMSC	1	1	1	0	0	1	1	1	1	1	0	0	0	0	0	1
94	79468	1385	2019	wielkopolskie	FPEs	SL8	CC8	ST8	CT9837	II	IIa	1	1	1	1	1	0	1	0	0	0	0	0	0	0	0	0	0	0	0	0	0	1	1	1	1	1	1	1	1	1	1	1	0	0	0	0	0	1
95	79469	1386	2019	wielkopolskie	RTE	SL8	CC8	ST8	CT9838	II	IIa	1	1	1	1	1	0	1	0	0	0	0	0	0	0	0	0	0	0	0	0	0	1	1	1	1	1	1	1	1	1	1	1	0	0	0	0	0	1
96	79470	1394	2019	wielkopolskie	RTE	SL121	CC121	ST121	CT9851	II	IIa	1	1	1	1	1	1	1	0	0	0	0	0	0	0	0	0	0	0	0	0	0	PMSC	1	1	1	0	0	1	1	1	1	1	0	0	0	0	0	1
97	79471	1398	2019	podkarpackie	Raw meat	SL155	CC155	ST155	CT9832	II	IIa	1	1	1	1	1	1	1	0	0	0	0	0	0	0	0	0	0	0	0	0	0	1	1	1	1	1	1	1	1	1	1	1	0	0	0	0	0	1
98	79472	1423	2019	wielkopolskie	FPEs	SL155	CC155	ST155	CT9832	II	IIa	1	1	1	1	1	1	1	0	0	0	0	0	0	0	0	0	0	0	0	0	0	1	1	1	1	1	1	1	1	1	1	1	0	0	0	0	0	1
99	79473	1469	2019	warmińsko-mazurskie	FPEs	SL8	CC8	ST8	CT750	II	IIa	1	1	1	1	1	1	1	0	0	0	0	0	0	0	0	0	0	0	0	0	0	1	1	1	1	1	1	1	1	1	1	1	0	0	0	0	0	1
100	79474	1500	2019	warmińsko-mazurskie	FPEs	SL155	CC155	ST155	CT1170	II	IIa	1	1	1	1	1	1	1	0	0	0	0	0	0	0	0	0	0	0	0	0	0	1	1	1	1	1	1	1	1	1	1	1	0	0	0	0	0	1
[truncated: 226 more columns]
