# Supplementary material for: Genetic Diversity and Relationships of Listeria monocytogenes Serogroup IIa Isolated in Poland
Source: Microorganisms. 2022 Feb 28;10(3):532. doi: 10.3390/microorganisms10030532 (PMC8951407; doi:10.3390/microorganisms10030532)
Supplement: Supplementary file 1 [file microorganisms-10-00532-s001.zip › Supplementary files/Table S2. L. monocytogenes WGS sequence parameters..xlsx]

## Sheet: sequence bin stats
Table S2. L. monocytogenes sequence parameters.
No.	BIGSdb ID	Contigs	Total length	Min. contig length	Max. contig length	Mean contig length	StdDev contig length	N50 contig number	N50 contig length (L50)	N90 contig number	N90 contig length (L90)	N95 contig number	N95 contig length (L95)	%GC
1	79375	16	2981449	128	1470999	186341	384067	583578	2	228900	4	91232	6	37.9
2	79376	42	2979362	128	389380	70937	93624	149916	6	53263	18	43566	21	37.9
3	79377	40	2976227	128	404062	74406	97680	195245	6	55632	17	46202	20	37.9
4	79378	29	2987801	128	784189	103028	221963	583951	3	229104	5	77253	7	37.9
5	79379	18	2980918	128	849814	165607	276234	686004	2	228900	5	101121	6	37.9
6	79380	21	2982676	128	784189	142032	251659	583821	3	228900	5	91232	7	37.9
7	79381	66	3078975	149	781589	46651	139836	475047	3	125819	8	64140	10	37.9
8	79382	23	3075440	128	1037072	133715	255519	507678	2	153611	6	64140	8	37.9
9	79383	18	3012139	167	699766	167341	240151	579809	3	216655	6	79267	8	37.8
10	79384	64	3001179	149	1217698	46893	176020	541806	2	125819	7	64856	8	38
11	79385	51	3073720	118	781588	60269	155712	474922	3	125819	8	64856	10	37.9
12	79386	22	2974723	214	588151	135215	173620	326798	4	99290	9	71719	11	37.9
13	79387	160	3030621	118	1222710	18941	113018	524679	2	125819	7	61097	9	38.1
14	79388	31	2898699	128	600392	93506	143664	304133	4	82888	12	64446	14	37.9
15	79389	16	2958440	270	620606	184903	211002	439778	3	217552	7	99290	8	37.8
16	79390	46	3021399	118	749097	65683	164752	509784	3	98978	8	64140	9	37.8
17	79391	20	3014305	136	700500	150715	233003	579785	3	217422	6	79267	8	37.8
18	79392	149	3011708	118	1260930	20213	119291	524730	2	98981	7	41125	9	37.8
19	79393	17	2979443	128	1470910	175261	375177	583456	2	231942	4	81716	6	37.9
20	79394	18	3057967	128	1036911	169887	286051	580882	2	99081	6	64140	7	37.8
21	79395	91	3105020	118	579307	34121	109046	482133	3	97504	10	46735	13	37.8
22	79396	21	3028766	128	734392	144227	223875	434455	3	228900	6	91232	8	37.9
23	79397	50	2996155	118	1217698	59923	190084	462410	2	125819	8	64140	9	38
24	79398	18	2851012	128	784189	158390	263935	685311	2	228900	5	101121	6	37.9
25	79399	47	3023091	118	783501	64321	155640	465249	3	98978	9	64141	10	37.8
26	79400	46	2999633	118	1222715	65209	198201	465338	2	125819	8	64140	9	38
27	79401	23	2903246	128	784188	126228	233543	685197	2	267684	5	101121	7	37.9
28	79402	66	3069628	118	780854	46510	138956	482625	3	98981	9	61097	11	37.8
29	79403	57	3040928	118	1259047	53350	190539	542184	2	126940	6	64856	8	37.9
30	79404	69	3069849	105	779092	44491	136156	482630	3	99357	9	61097	11	37.8
31	79405	82	3004792	201	229777	36644	47721	82510	12	24539	36	10657	46	37.9
32	79406	45	2982037	118	1218172	66267	207092	542167	2	98979	7	76274	8	37.9
33	79407	26	2953131	128	784126	113582	213340	509882	3	218084	6	101121	7	37.9
34	79408	34	3024525	214	658896	88957	174003	438993	3	99290	8	64051	9	37.8
35	79409	75	3043301	118	1217699	40577	158298	462410	2	125819	8	64856	9	38
36	79410	25	2951386	128	1518494	118055	326600	1518494	1	228900	4	101121	5	37.9
37	79411	22	3018604	128	908675	137209	240973	475036	3	99081	7	64140	8	37.8
38	79412	19	3007312	255	558263	158280	181760	326593	4	216655	8	99290	9	37.9
39	79413	33	3016722	203	438897	91416	136886	332582	4	64051	11	45655	14	37.8
40	79414	35	3035370	167	658806	86725	171738	511293	3	99287	8	72281	10	37.8
41	79415	31	3029113	167	588150	97713	171774	438992	3	99266	8	72281	10	37.8
42	79416	116	3079440	106	779489	26547	106791	481628	3	97884	9	46735	12	37.9
43	79417	20	2860351	128	1470311	143018	348398	1470311	1	228900	4	69393	5	37.9
44	79418	25	2861411	128	784188	114456	222995	543622	3	228900	5	97604	7	38
45	79419	37	3073651	128	578573	83072	171570	482271	3	97589	8	37827	10	37.9
46	79420	99	3074631	100	749861	31057	114325	509797	3	98978	9	38038	12	37.8
47	79421	32	3054559	167	722502	95455	176529	430453	3	128124	8	79267	10	37.9
48	79422	75	3038020	118	780854	40507	132990	482895	3	100223	8	64140	10	37.9
49	79423	62	3004212	118	1095225	48455	158949	466839	2	125819	9	64139	10	38
50	79424	29	2985200	128	555109	102938	178545	514679	3	101311	8	64502	9	37.8
51	79425	20	2890667	270	1502511	144533	345459	1502511	1	167342	5	99463	6	37.9
52	79426	147	3051126	118	1218901	20756	118549	567717	2	99357	7	64140	9	37.8
53	79427	28	3030126	138	588140	108219	149047	229729	4	84355	12	53614	14	37.9
54	79428	14	2884998	128	1505321	206071	401574	1505321	1	167104	5	99081	6	37.9
55	79429	20	2986916	128	784188	149346	238049	534673	3	217619	6	101121	7	37.8
56	79430	19	2854006	128	788992	150211	259826	685936	2	228825	5	101121	6	38
57	79431	75	3075458	118	1264058	41006	165793	515352	2	98981	8	61097	10	37.8
58	79432	31	3018254	128	535194	97363	172320	424270	4	209997	7	64446	9	37.8
59	79433	18	2942902	128	784188	163495	241578	510566	3	217592	6	101121	7	37.9
60	79434	18	2941963	128	752157	163442	241351	510565	3	201810	6	101121	7	37.9
61	79435	63	2891160	115	1502405	45891	202406	1502405	1	166879	5	98975	6	37.9
62	79436	228	2960170	122	784090	12983	81436	571618	3	114853	6	59070	8	37.9
63	79437	25	2906857	128	784188	116274	237202	685938	2	228900	5	101121	6	37.9
64	79438	36	3073829	149	1259460	85384	237631	580202	2	126319	6	64140	8	37.9
65	79439	44	3037775	118	1259431	69040	214918	542047	2	126319	6	64856	8	37.9
66	79440	25	2904402	128	784063	116176	237237	685919	2	231942	5	101125	6	37.9
67	79441	16	2982002	270	1502432	186375	378658	1502432	1	167176	5	99297	6	37.9
68	79442	58	3067881	124	816481	52895	167578	729779	2	101341	6	76998	7	37.8
69	79443	76	3126175	118	1264790	41134	165848	531968	2	108508	8	61097	10	37.9
70	79444	114	3009920	114	700751	26403	113266	587869	3	201212	6	98983	7	37.9
71	79445	19	2892431	128	1335919	152233	307412	331434	2	118178	7	101122	8	37.9
72	79446	119	3049065	114	588051	25622	95154	404899	4	86709	9	50570	11	37.8
73	79447	22	2942337	128	784101	133743	226690	509841	3	217592	6	101121	7	37.9
74	79448	22	3015019	167	691336	137046	216586	506223	3	99290	7	72281	9	37.8
75	79449	18	3013538	167	700500	167419	240912	584855	3	216655	6	79267	8	37.8
76	79450	21	2933954	173	700487	139712	231210	579808	3	217418	6	99290	7	37.9
77	79451	16	2859861	128	784189	178741	274732	686036	2	228956	5	101121	6	37.9
78	79452	24	2853951	128	784188	118915	225659	685320	2	162506	6	101121	7	37.9
79	79453	29	3016833	167	588150	104029	177280	438991	3	99290	8	79267	9	37.8
80	79454	18	2936460	128	1553275	163137	372475	1553275	1	167015	5	99081	6	37.9
81	79455	28	3060308	128	588151	109297	179019	438992	3	99290	8	64051	10	37.9
82	79456	21	3015843	128	700545	143612	229441	579809	3	217547	6	79267	8	37.8
83	79457	22	3018617	167	700544	137210	225913	579797	3	217547	6	79267	8	37.9
84	79458	23	3073622	128	788672	133636	249910	583987	3	269640	5	91232	7	37.9
85	79459	23	2944000	128	784188	128000	245933	752713	2	228956	5	101121	6	37.9
86	79460	21	3013951	167	698927	143521	229462	581482	3	217552	6	79267	8	37.8
87	79461	49	3051837	114	701639	62282	165637	582421	3	201047	6	86709	8	37.8
88	79462	21	3014919	167	700912	143568	229443	579785	3	217549	6	79267	8	37.8
89	79463	74	3020874	114	698827	40823	135336	579539	3	98983	7	86709	8	37.8
90	79464	63	3029534	118	1217824	48088	178097	567354	2	99357	7	64140	9	37.9
91	79465	48	3025076	118	783501	63022	163034	475661	3	98978	8	64141	9	37.8
92	79466	16	2928765	173	1028147	183048	312239	701181	2	216655	5	99290	6	37.9
93	79467	101	3010612	103	1217698	29808	140897	525115	2	125819	7	64856	8	38
94	79468	19	2967226	214	701665	156170	222139	438992	3	200673	7	99290	8	37.9
95	79469	20	2962097	157	620606	148105	210469	438992	3	216654	7	99290	8	37.9
96	79470	62	3042959	118	1222848	49080	180161	563767	2	125819	7	64140	8	37.9
97	79471	20	3074755	128	784063	153738	262133	582166	3	272869	5	91232	7	37.9
98	79472	66	3074309	110	784090	46580	157183	582135	3	101021	6	77885	7	37.8
99	79473	48	3018014	114	588030	62875	144866	425632	3	98983	8	59587	10	37.8
100	79474	103	2906743	153	784090	28221	124682	686391	2	228490	5	101341	6	37.9
