# Supplementary material for: Genetic Diversity and Relationships of Listeria monocytogenes Serogroup IIa Isolated in Poland
Source: Microorganisms. 2022 Feb 28;10(3):532. doi: 10.3390/microorganisms10030532 (PMC8951407; doi:10.3390/microorganisms10030532)
Supplement: Supplementary file 1 [file microorganisms-10-00532-s001.zip › Supplementary files/Table S3. L. monocytogenes isolates from Poland selected for comparison wih the present strains..xlsx]

## Sheet: Arkusz1
Table S3. L. monocytogenes isolates from Poland selected for comparison wih the present strains.
No.	BIGSdb ID	Accession number	Isolate	Isolation year	Continent	Country	Source	Food type	Source_lab	Phylogenetic lineage	Clonal complex	Sublineage	Cgmlst type
1	41694	ERR2522590	sam_05DF04E9-CAEE-4F4D-ACCE-BDA952539535	2015	Europe	Poland	Human		European Centre for Disease Prevention and Control	II	CC155	SL155	CT1170
2	41695	ERR2522592	sam_41FEDB65-1288-4E22-92B4-0C39A0159317	2015	Europe	Poland	Human		European Centre for Disease Prevention and Control	II	CC155	SL155	CT4249
3	41698	ERR2522604	sam_9799ED84-38D5-4946-8831-D3CD8CEBB7BA	2015	Europe	Poland	Human		European Centre for Disease Prevention and Control	II	CC155	SL155	CT5623
4	46894		NVRI/19/17138/1152	2019	Europe	Poland	FPEs		National Veterinary Research Institute, Pulawy, Poland	II	CC155	SL155	CT842
5	46913		NVRI/19/26676/1782	2019	Europe	Poland	Food	Fish or seafood	National Veterinary Research Institute, Pulawy, Poland	II	CC155	SL155	CT1170
6	46914		NVRI/19/26676/1783	2019	Europe	Poland	Food	Fish or seafood	National Veterinary Research Institute, Pulawy, Poland	II	CC155	SL155	CT1170
7	19175	SRR3278101	FDA00006789		Europe	Poland	Food		CFSAN	II	CC121	SL121	CT5632
8	34374	ERR2522441	5227/12	2012	Europe	Poland	Human		National Medicines Institute, Department of Epidemiology and Clinical Microbiology, Warsaw, Poland	II	CC121	SL121	CT5633
9	41676		sam_65548B2A-952F-4659-B0CB-8CDBC41EC472	2019	Europe	Poland	Human		European Centre for Disease Prevention and Control	II	CC121	SL121	CT5598
10	41699	SRR2015677	FDA00008984	2015	Europe	Poland	Food		FDA	II	CC121	SL121	CT4689
11	41700	SRR9114627	CFSAN094153	2019	Europe	Poland	Food		FDA	II	CC121	SL121	CT2191
12	41702	SRR9283124	CFSAN094155	2019	Europe	Poland	Food		FDA	II	CC121	SL121	CT893
13	41703	SRR9283156	CFSAN094156	2019	Europe	Poland	Food		FDA	II	CC121	SL121	CT893
14	46896		NVRI/19/20309/1380	2019	Europe	Poland	FPEs		National Veterinary Research Institute, Pulawy, Poland	II	CC121	SL121	CT1249
15	46897		NVRI/19/20309/1381	2019	Europe	Poland	FPEs		National Veterinary Research Institute, Pulawy, Poland	II	CC121	SL121	CT1249
16	46903		NVRI/19/24901/1618	2019	Europe	Poland	FPEs		National Veterinary Research Institute, Pulawy, Poland	II	CC121	SL121	CT893
17	46904		NVRI/19/26676/1773	2019	Europe	Poland	Food	Fish or seafood	National Veterinary Research Institute, Pulawy, Poland	II	CC121	SL121	CT7221
18	46905		NVRI/19/26676/1774	2019	Europe	Poland	Food	Fish or seafood	National Veterinary Research Institute, Pulawy, Poland	II	CC121	SL121	CT7221
19	46907		NVRI/19/26676/1776	2019	Europe	Poland	Food	Fish or seafood	National Veterinary Research Institute, Pulawy, Poland	II	CC121	SL121	CT7221
20	46908		NVRI/19/26676/1777	2019	Europe	Poland	FPEs		National Veterinary Research Institute, Pulawy, Poland	II	CC121	SL121	CT7223
21	46910		NVRI/19/26676/1779	2019	Europe	Poland	FPEs		National Veterinary Research Institute, Pulawy, Poland	II	CC121	SL121	CT7222
22	46911		NVRI/19/26676/1780	2019	Europe	Poland	Food	Fish or seafood	National Veterinary Research Institute, Pulawy, Poland	II	CC121	SL121	CT7221
23	46917		NVRI/19/26913/1818	2019	Europe	Poland	Food	Fish or seafood	National Veterinary Research Institute, Pulawy, Poland	II	CC121	SL121	CT7224
24	46918		NVRI/19/26913/1819	2019	Europe	Poland	Food	Fish or seafood	National Veterinary Research Institute, Pulawy, Poland	II	CC121	SL121	CT7224
25	46919		NVRI/19/26913/1820	2019	Europe	Poland	Food	Fish or seafood	National Veterinary Research Institute, Pulawy, Poland	II	CC121	SL121	CT7224
26	46920		NVRI/19/26913/1821	2019	Europe	Poland	Food	Fish or seafood	National Veterinary Research Institute, Pulawy, Poland	II	CC121	SL121	CT7224
27	1170	SRR975366	SRR975366	2008	Europe	Poland	Food		Centers for Disease Control and Prevention, Atlanta, Georgia, USA	II	CC8	SL8	CT777
28	34379	ERR2522454	5981/12	2012	Europe	Poland	Human		National Medicines Institute, Department of Epidemiology and Clinical Microbiology, Warsaw, Poland	II	CC8	SL8	CT750
29	34402	ERR2522508	5014/13	2013	Europe	Poland	Human		National Medicines Institute, Department of Epidemiology and Clinical Microbiology, Warsaw, Poland	II	CC8	SL8	CT5630
30	34404	ERR2522510	5133/13	2013	Europe	Poland	Human		National Medicines Institute, Department of Epidemiology and Clinical Microbiology, Warsaw, Poland	II	CC8	SL8	CT750
31	41669	ERR2522478	sam_4DE5ED76-11FA-4254-A644-EE9767109A75	2013	Europe	Poland	Human		European Centre for Disease Prevention and Control	II	CC8	SL8	CT5595
32	41672	ERR2522502	sam_2456F16E-843E-4D30-BB73-9AF9983C84A3	2013	Europe	Poland	Human		European Centre for Disease Prevention and Control	II	CC8	SL8	CT5594
33	41684	ERR2522554	sam_8F15C8BD-F4AF-4E85-AE66-F6D084099898	2014	Europe	Poland	Human		European Centre for Disease Prevention and Control	II	CC8	SL8	CT750
34	41690	ERR2522576	sam_DCAA488D-779E-4543-896A-8BFF9FBEA8EF	2015	Europe	Poland	Human		European Centre for Disease Prevention and Control	II	CC8	SL8	CT5596
35	46899		NVRI/19/24383/1608	2019	Europe	Poland	Food	Fish or seafood	National Veterinary Research Institute, Pulawy, Poland	II	CC8	SL8	CT7220
36	46900		NVRI/19/24682/1615	2019	Europe	Poland	Food	Fish or seafood	National Veterinary Research Institute, Pulawy, Poland	II	CC8	SL8	CT777
37	46901		NVRI/19/24682/1616	2019	Europe	Poland	Food	Fish or seafood	National Veterinary Research Institute, Pulawy, Poland	II	CC8	SL8	CT777
38	46902		NVRI/19/24682/1617	2019	Europe	Poland	Food	Fish or seafood	National Veterinary Research Institute, Pulawy, Poland	II	CC8	SL8	CT777
39	41692	ERR2522588	sam_2A310D68-7040-4E0F-8347-8FB10D6BE32B	2015	Europe	Poland	Human		European Centre for Disease Prevention and Control	II	CC11	SL451	CT798
