# Supplementary material for: Genetic Diversity and Relationships of Listeria monocytogenes Serogroup IIa Isolated in Poland
Source: Microorganisms. 2022 Feb 28;10(3):532. doi: 10.3390/microorganisms10030532 (PMC8951407; doi:10.3390/microorganisms10030532)
Supplement: Supplementary file 1 [file microorganisms-10-00532-s001.zip › Supplementary files/Table S4. Prophages and plasmids in Listeria monocytogenes strains tested..xlsx]

## Sheet: Arkusz1
Table S4. Prophages and plasmids in Listeria monocytogenes strains tested.
				Prophages								Plasmids
No.	BIGSdb id	Clonal complex	Length (bp)	Total number of prophages regions	Number of prohages regions according to the status			Names of phages with intact status	Characteristic of phages with intact status			No. of plasmids	Locus targeted	Note	Contig	Lenght (bp)
					Intact	Questionable	Incomplete		Size (Kb)	Number of proteins	Positition
1	79375	CC155	2981577	2	1	1		PHAGE_Lister_vB_LmoS_188_NC_028871(28)	40.3Kb	62	508526-548919	1	rep26	M643p00680(N1011Aplasmid)	NODE_6_length_91232_cov_55.266	1650
2	79376	CC155	2979490	2	1	1		PHAGE_Lister_vB_LmoS_188_NC_028871(28)	40.3Kb	62	74864-115257	1	rep26	M643p00680(N1011Aplasmid)	NODE_17_length_61507_cov_21.9431	1650
3	79377	CC155	2976355	2	1	1		PHAGE_Lister_A006_NC_009815(28)	53 Kb	64	34660-87730	1	rep26	M643p00680(N1011Aplasmid)	NODE_15_length_64685_cov_14.1152	1650
4	79378	CC155	2987929	2	1	1		PHAGE_Lister_vB_LmoS_188_NC_028871(28)	40.3 Kb	62	508899-549292	1	rep26	M643p00680(N1011Aplasmid)	NODE_7_length_77253_cov_72.4332	1650
5	79379	CC155	2981046	2	1	1		PHAGE_Lister_vB_LmoS_188_NC_028871(28)	40.3 Kb	62	508523-548916	1	rep26	M643p00680(N1011Aplasmid)	NODE_7_length_77253_cov_77.6906	1650
6	79380	CC155	2982804	2	1	1		PHAGE_Lister_vB_LmoS_188_NC_028871(28)	40.3 Kb	62	508769-549162	1	rep26	M643p00680(N1011Aplasmid)	NODE_7_length_91232_cov_52.4149	1650
7	79381	CC121	3079214	4		3	1					1	rep26	repA(pLM5578)	NODE_11_length_61000_cov_73.570031	1650
8	79382	CC121	3075568	5		3	2					1	rep26	repA(pLM5578)	NODE_9_length_61050_cov_41.4333	1650
9	79383	CC8	3012267	3	1	2		PHAGE_Lister_LP_HM00113468_NC_049900(39)	52.1 Kb	58	259584-311695	1	rep26	repA(pLGUG1)	NODE_8_length_79267_cov_23.2846	1809
10	79384	CC121	3001418	2		1	1					1	rep26	repA(pLM5578)	NODE_9_length_61000_cov_54.624592	1650
11	79385	CC121	3073959	5		3	2					1	rep26	repA(pLM5578)	NODE_11_length_61000_cov_44.911052	1650
12	79386	CC8	2974851	5		3	2					0
13	79387	CC121	3030777	3		1	2					1	rep26	repA(pLM5578)	NODE_9_length_61097_cov_37.766568	1650
14	79388	CC155	2898827	2		2						0
15	79389	CC8	2958568	4	2	2		PHAGE_Lister_A006_NC_009815(7)	35.1 Kb	48	412072-447240	0
								PHAGE_Lister_LP_HM00113468_NC_049900(43)	44.4 Kb	59	673-45169
16	79390	CC121	3021555	4		2	2					1	rep26	repA(pLM5578)	NODE_11_length_60999_cov_89.194248	1650
17	79391	CC8	3014433	3	1	2		PHAGE_Lister_LP_HM00113468_NC_049900(39)	52.8 Kb	58	259584-312428	1	rep26	repA(pLGUG1)	NODE_8_length_79267_cov_31.6405	1809
18	79392	CC121	3012029	2	1	1		PHAGE_Lister_LP_101_NC_024387(35)	43.2 Kb	69	743281-786513	1	rep26	repA(pLM5578)	NODE_9_length_41125_cov_68.803912	1650
19	79393	CC155	2979571	2		2						1	rep26	M643p00680(N1011Aplasmid)	NODE_6_length_81716_cov_60.5598	1650
20	79394	CC121	3058095	4	1	3		PHAGE_Lister_LP_030_3_NC_024384(36)	36.9 Kb	57	106-37070	1	rep26	repA(pLM5578)	NODE_8_length_61049_cov_58.7162	1571
21	79395	CC121	3105349	8		2	6					1	rep26	repA(pLM5578)	NODE_12_length_61097_cov_77.989626	1650
22	79396	CC155	3028894	3	2	1		PHAGE_Lister_B054_NC_009813(66)	48.3 Kb	75	38244-86611	1	rep26	M643p00680(N1011Aplasmid)	NODE_8_length_91232_cov_26.1163	1650
								PHAGE_Lister_vB_LmoS_188_NC_028871(28)	40.3 Kb	65	507116-547509
23	79397	CC121	2996482	2		1	1					1	rep26	repA(pLM5578)	NODE_10_length_61000_cov_41.349934	1650
24	79398	CC155	2851140	1		1						0
25	79399	CC121	3023335	3	2	1		PHAGE_Lister_LP_101_NC_024387(39)	52.1 Kb	59	731337-783501	1	rep26	repA(pLM5578)	NODE_11_length_61082_cov_49.326580	1650
								PHAGE_Lister_vB_LmoS_188_NC_028871(34)	36.1 Kb	55	346-36491
26	79400	CC121	2999877	2		1	1					1	rep26	repA(pLM5578)	NODE_10_length_61089_cov_82.391710	1650
27	79401	CC155	2903374	3		3						0
28	79402	CC121	3069868	5	1	1	3	PHAGE_Lister_LP_101_NC_024387(37)				1	rep26	repA(pLM5578)	NODE_11_length_61097_cov_33.115257	1650
29	79403	CC121	3041084	3		2	1					1	rep26	repA(pLM5578)	NODE_9_length_61000_cov_94.874891	1650
30	79404	CC121	3070285	6	1	1	4	PHAGE_Lister_LP_101_NC_024387(35)	34.6 Kb	50	1171-35794	1	rep26	repA(pLM5578)	NODE_11_length_61097_cov_122.194248	1650
31	79405	CC7	3004920		1	2	3	PHAGE_Strept_315.2_NC_004585(6)	23.9 Kb	31	337-24311	2	rep25	pLM330006(pLM33)	NODE_65_length_3123_cov_7.13885	1761
													rep32	pli0023(pLI100)	NODE_56_length_6513_cov_5.20655	1161
32	79406	CC121	2982289	2	1	1		PHAGE_Lister_LP_030_3_NC_024384(37)	47.6 Kb	70	124-47751	1	rep26	repA(pLM5578)	NODE_10_length_61000_cov_53.939645	1650
33	79407	CC155	2953259	4	1	1	2	PHAGE_Lister_LP_HM00113468_NC_049900(34)	34.1 Kb	49	143-34329		0
34	79408	CC8	3024653	3	1	2		PHAGE_Lister_LP_HM00113468_NC_049900(39)	52.8	58	259584-312428	1	rep26	repA(pLGUG1)	NODE_11_length_39503_cov_22.2522	1809
35	79409	CC121	3043628	4		2	2					1	rep26	repA(pLM5578)	NODE_10_length_61000_cov_65.251038	1650
36	79410	CC155	2951514	3	1	2		PHAGE_Lister_B054_NC_009813(61)	47.6 Kb	73	1433171-1480828	0
37	79411	CC121	3018732	3	1	1	1	PHAGE_Lister_LP_101_NC_024387(37)	36.3 Kb	53	993-37373	1	rep26	repA(pLM5578)	NODE_9_length_60943_cov_27.7246	1650
38	79412	CC8	3007440	6	1	3	2	PHAGE_Lister_A006_NC_009815(7)	35.1 Kb	48	412072-447240	0
39	79413	CC8	3016850	3	1	2		PHAGE_Lister_LP_HM00113468_NC_049900(41)	41.9 Kb	56	673-42608	1	rep26	repA(pLGUG1)	NODE_10_length_86625_cov_10.9243	1809
40	79414	CC8	3035498	2		2						1	rep26	repA(pLGUG1)	NODE_9_length_79267_cov_27.1334	1809
41	79415	CC8	3016850	3	1	2		PHAGE_Lister_LP_HM00113468_NC_049900(43)	43.6 Kb	57	673-44365	1	rep26	repA(pLGUG1)	NODE_9_length_79267_cov_35.3565	1809
42	79416	CC121	3079596	6	1	1	4	PHAGE_Lister_LP_101_NC_024387(35)	47.2 Kb	51	731112-778319	1	rep26	repA(pLM5578)	NODE_11_length_61097_cov_128.902786	1650
43	79417	CC155	2860479	1		1						0
44	79418	CC155	2861539	1		1						0
45	79419	CC121	3073779	5		3	2					1	rep26	repA(pLM5578)	NODE_10_length_37827_cov_25.5586	1650
46	79420	CC121	3074964	1		1	4					1	rep26	repA(pLM5578)	NODE_11_length_61097_cov_72.296296	1650
47	79421	CC8	3054687	3	1	2		PHAGE_Lister_LP_HM00113468_NC_049900(39)	53.1 Kb	61	259584-312721	1	rep26	repA(pLGUG1)	NODE_10_length_79267_cov_23.1145	1809
48	79422	CC121	3038176	3	1	2		PHAGE_Lister_LP_101_NC_024387(37)	36.3 Kb	56	1168-37557	1	rep26	repA(pLM5578)	NODE_11_length_61097_cov_74.987365	1650
49	79423	CC121	3004456	2		1	1					1	rep26	repA(pLM5578)	NODE_11_length_61097_cov_75.440003	1650
50	79424	CC155	2985328	6	2	1	3	PHAGE_Lister_B054_NC_009813(65)	48.2 Kb	79	420546-468802	0
								PHAGE_Lister_LP_HM00113468_NC_049900(35)	34.6 Kb	48	488991-523656
51	79425	CC7	2890795	3	1	1	1	PHAGE_Lister_LP_101_NC_024387(47)	43.6 Kb	65	983019-1026596	0
52	79426	CC121	3051282	3	2	1		PHAGE_Lister_A118_NC_003216(40)	55.2 Kb	69	34740-89944	1	rep26	repA(pLM5578)	NODE_10_length_61000_cov_70.916895	1650
								PHAGE_Lister_LP_030_3_NC_024384(37)	47.6 Kb	70	124-47751
53	79427	CC8	3030254	4	2	2		PHAGE_Lister_LP_HM00113468_NC_049900(40)	56.3 Kb	65	141878-198238	1	rep26	repA(pLGUG1)	NODE_12_length_84355_cov_13.2256	1809
								PHAGE_Entero_lato_NC_001422(7)	5.3 Kb	7	1-5375
54	79428	CC11	2885254	2	1	1		PHAGE_Lister_LP_101_NC_024387(41)	48.4 Kb	64	468922-517365	0
55	79429	CC155	2987172	5	2	2	1	PHAGE_Lister_B054_NC_009813(60)	46.5 Kb	72	54478-100990	0
								PHAGE_Lister_A006_NC_009815(22)	25.5 Kb	32	141-25728
56	79430	CC155	2854134	1		1						0
57	79431	CC121	3075614	6	1	1	4	PHAGE_Lister_LP_101_NC_024387(42)	41.02 Kb	63	743182-784399	1	rep26	repA(pLM5578)	NODE_10_length_61097_cov_92.039692	1650
58	79432	CC155	3018382	7	2	1	4	PHAGE_Lister_vB_LmoS_188_NC_028871(23)	26.2 Kb	34	96-26379	0
								PHAGE_Lister_B054_NC_009813(60)	60.4 Kb	72	20233-80709
59	79433	CC155	2943030	4	1	2	1	PHAGE_Lister_A006_NC_009815(22)	25.5 Kb	32	141-25728	0
60	79434	CC155	2942219	4	1	2	1	PHAGE_Lister_vB_LmoS_188_NC_028871(23)	33.8 Kb	52	508314-542196	0
61	79435	CC7	2891316	2	1	1		PHAGE_Lister_LP_101_NC_024387(47)	43.3 Kb	66	475909-519285	0
62	79436	CC155	2960648	2		2						0
63	79437	CC155	2906985	2		1	1					0
64	79438	CC121	3074068	4		3	1					1	rep26	repA(pLM5578)	NODE_9_length_61000_cov_77.093594	1650
65	79439	CC121	3037931	3		2	1					1	rep26	repA(pLM5578)	NODE_9_length_61000_cov_93.840635	1650
66	79440	CC155	2904530	2		2						0
67	79441	CC7	2982130	5	2	1	2	PHAGE_Lister_LP_101_NC_024387(47)	43.5 Kb	69	983004-1026516	1	rep25	pLM330006(pLM33)	NODE_10_length_5709_cov_13.0365	1761
								PHAGE_Lister_A500_NC_009810(40)	41.6 Kb	67	130365-172040
68	79442	CC155	3068369	4	3	1		PHAGE_Lister_A006_NC_009815(7)	35.3 Kb	49	359319-394648	1	rep26	M643p00680(N1011Aplasmid)	NODE_7_length_76998_cov_55.553880	1650
								PHAGE_Lister_LP_101_NC_024387(42)	43.3 Kb	67	210241-253630
								PHAGE_Lister_A006_NC_009815(28)	51.9 Kb	57	35161-87125
69	79443	CC121	3126331	8	1	1	6	PHAGE_Lister_LP_101_NC_024387(39)				1	rep26	repA(pLM5578)	NODE_10_length_61097_cov_106.273287	1650
70	79444	CC8	3010076	4	2	2		PHAGE_Lister_LP_HM00113468_NC_049900(39)	42Kb	58	399417-441461	0
								PHAGE_Lister_A118_NC_003216(44)	54.2 Kb	68	34831-89115
71	79445	CC37	2892559	2	1	1		PHAGE_Lister_A006_NC_009815(43)	41.3 Kb	60	95729-137035	0
72	79446	CC8	3049303	5		2	3					1	rep26	repA(pLGUG1)	NODE_9_length_86709_cov_100.081506	1809
73	79447	CC155	2942593	4	1	2	1	PHAGE_Lister_A006_NC_009815(22)	25.5 Kb	32	141-25728	0
74	79448	CC8	3015275	3	1	2		PHAGE_Lister_LP_HM00113468_NC_049900(42)	58.2 Kb	62	673-51525	1	rep26	repA(pLGUG1)	NODE_8_length_79267_cov_41.1633	1809
75	79449	CC8	3013666	3	1	2		PHAGE_Lister_LP_HM00113468_NC_049900(39)	52.8 Kb	58	259584-312428	1	rep26	repA(pLGUG1)	NODE_8_length_79267_cov_33.6155	1809
76	79450	CC8	2934082	3	1	2		PHAGE_Lister_LP_101_NC_024387(38)	41.6 Kb	66	399466-441147	0
77	79451	CC155	2859989	1		1						0
78	79452	CC155	2854079	1		1						0
79	79453	CC8	3016961	5		3	2					1	rep26	repA(pLGUG1)	NODE_9_length_79267_cov_35.4557	1809
80	79454	CC11	2936460	3	2	1		PHAGE_Lister_B054_NC_009813(60)	48.1 Kb	72	37200-85383	0
								PHAGE_Lister_LP_101_NC_024387(38)	53.2 Kb	62	523621-576831
81	79455	CC8	3060308	5		3	2					1	rep26	repA(pLGUG1)	NODE_9_length_79267_cov_17.6359	1809
82	79456	CC8	3015843	3	1	2		PHAGE_Lister_LP_HM00113468_NC_049900(37)	52.8 Kb	62	259584-312473	1	rep26	repA(pLGUG1)	NODE_8_length_79267_cov_43.188	1809
83	79457	CC8	3018745	3	1	2		PHAGE_Lister_LP_101_NC_024387(37)	52.8 Kb	63	259584-312472	1	rep26	repA(pLGUG1)	NODE_8_length_79267_cov_40.3194	1809
84	79458	CC155	3073750	4	3	1		PHAGE_Lister_B054_NC_009813(65)	48.2 Kb	79	454982-503238	1	rep26	M643p00680(N1011Aplasmid)	NODE_7_length_91232_cov_62.2379	1650
								PHAGE_Lister_vB_LmoS_188_NC_028871(28)	40.3 Kb	62	508935-549328
								PHAGE_Lister_A118_NC_003216(42)	43 Kb	67	130359-173447
85	79459	CC155	2944128	4	1	2	1	PHAGE_Lister_vB_LmoS_188_NC_028871(23)	34.1 Kb	53	508624-542743	0
86	79460	CC8	3014079	3	1	2		PHAGE_Lister_LP_HM00113468_NC_049900(35)	51.2 Kb	57	259584-310855	1	rep26	repA(pLGUG1)	NODE_8_length_79267_cov_16.3936	1809
87	79461	CC8	3052079	4	3	1		PHAGE_Lister_LP_HM00113468_NC_049900(46)	42.9 Kb	70	399412-442346	1	rep26	repA(pLGUG1)	NODE_8_length_86709_cov_37.158729	1809
								PHAGE_Lister_A006_NC_009815(7)	35.1 Kb	48	412022-447191
								PHAGE_Lister_A118_NC_003216(39)	47.1 Kb	67	504497-551624
88	79462	CC8	3015047	3	1	2		PHAGE_Lister_LP_HM00113468_NC_049900(39)	54.9 Kb	62	253396-308331	1	rep26	repA(pLGUG1)	NODE_8_length_79267_cov_21.6959	1809
89	79463	CC8	3021030	3	1	2		PHAGE_Lister_B025_NC_009812(35)	51.2 Kb	57	388012-439283	1	rep26	repA(pLGUG1)	NODE_8_length_86709_cov_38.153604	1809
90	79464	CC121	3029690	3	2	1		PHAGE_Lister_A118_NC_003216(41)	42.5 Kb	70	490214-532740	1	rep26	repA(pLM5578)	NODE_10_length_61000_cov_37.727525	1650
								PHAGE_Lister_LP_030_3_NC_024384(37)	47.6 Kb	70	124-47751
91	79465	CC121	3025232	3	2	1		PHAGE_Lister_LP_101_NC_024387(39)	46.2 Kb	59	1-46203	1	rep26	repA(pLM5578)	NODE_10_length_61082_cov_73.065568	1650
								PHAGE_Lister_vB_LmoS_188_NC_028871(34)	36.1 Kb	55	56-36201
92	79466	CC8	2928893	3	1	2		PHAGE_Lister_LP_HM00113468_NC_049900(39)	53.5 Kb	64	388065-441598	0
93	79467	CC121	3010851	3		1	2					1	rep26	repA(pLM5578)	NODE_9_length_61000_cov_85.371978	1650
94	79468	CC8	2967354	4	2	2		PHAGE_Lister_LP_HM00113468_NC_049900(39)	54 Kb	62	259584-313594	0
								PHAGE_Strept_315.2_NC_004585(7)	25.4 Kb	33	175018-200445
95	79469	CC8	2962225	5	1	3	1	PHAGE_Lister_A006_NC_009815(7)	35.3 Kb	48	173279-208609	0
96	79470	CC121	3043198	4		2	2					1	rep26	repA(pLM5578)	NODE_9_length_61000_cov_85.519705	1650
97	79471	CC155	3074883	4	3	1		PHAGE_Lister_B054_NC_009813(65)	48.2 Kb	79	455712-503968	1	rep26	M643p00680(N1011Aplasmid)	NODE_7_length_91232_cov_75.7753	1650
								PHAGE_Lister_vB_LmoS_188_NC_028871(28)	40.3 Kb	65	507109-547502
								PHAGE_Lister_A118_NC_003216(41)	43 Kb	65	133532-176620
98	79472	CC155	3074717	4	3	1		PHAGE_Lister_B054_NC_009813(64)	62.2 Kb	79	230371-292593	1	rep26	M643p00680(N1011Aplasmid)	NODE_7_length_77885_cov_58.227020	1650
								PHAGE_Lister_A006_NC_009815(28)	53 Kb	64	34610-87680
								PHAGE_Lister_A118_NC_003216(42)	43 Kb	67	130225-173313
99	79473	CC8	3018170	5	1	1	3	PHAGE_Lister_LP_HM00113468_NC_049900(36)	34.9 Kb	48	43-34995	1	rep26	repA(pLGUG1)	NODE_9_length_86709_cov_56.293841	1809
100	79474	CC155	2907301	2		2						0

## Sheet: Arkusz2
79375	M643p00680(N1011Aplasmid)
79376	M643p00680(N1011Aplasmid)
79377	M643p00680(N1011Aplasmid)
79378	M643p00680(N1011Aplasmid)
79379	M643p00680(N1011Aplasmid)
79380	M643p00680(N1011Aplasmid)
79381	repA(pLM5578)
79382	repA(pLM5578)
79383	repA(pLGUG1)
79384	repA(pLM5578)
79385	repA(pLM5578)
79386
79387	repA(pLM5578)
79388
79389
79390	repA(pLM5578)
79391	repA(pLGUG1)
79392	repA(pLM5578)
79393	M643p00680(N1011Aplasmid)
79394	repA(pLM5578)
79395	repA(pLM5578)
79396	M643p00680(N1011Aplasmid)
79397	repA(pLM5578)
79398
79399	repA(pLM5578)
79400	repA(pLM5578)
79401
79402	repA(pLM5578)
79403	repA(pLM5578)
79404	repA(pLM5578)
79405	pLM330006(pLM33), pli0023(pLI100)
79406	repA(pLM5578)
79407
79408	repA(pLGUG1)
79409	repA(pLM5578)
79410
79411	repA(pLM5578)
79412
79413	repA(pLGUG1)
79414	repA(pLGUG1)
79415	repA(pLGUG1)
79416	repA(pLM5578)
79417
79418
79419	repA(pLM5578)
79420	repA(pLM5578)
79421	repA(pLGUG1)
79422	repA(pLM5578)
79423	repA(pLM5578)
79424
79425
79426	repA(pLM5578)
79427	repA(pLGUG1)
79428
79429
79430
79431	repA(pLM5578)
79432
79433
79434
79435
79436
79437
79438	repA(pLM5578)
79439	repA(pLM5578)
79440
79441	pLM330006(pLM33)
79442	M643p00680(N1011Aplasmid)
79443	repA(pLM5578)
79444
79445
79446	repA(pLGUG1)
79447
79448	repA(pLGUG1)
79449	repA(pLGUG1)
79450
79451
79452
79453	repA(pLGUG1)
79454
79455	repA(pLGUG1)
79456	repA(pLGUG1)
79457	repA(pLGUG1)
79458	M643p00680(N1011Aplasmid)
79459
79460	repA(pLGUG1)
79461	repA(pLGUG1)
79462	repA(pLGUG1)
79463	repA(pLGUG1)
79464	repA(pLM5578)
79465	repA(pLM5578)
79466
79467	repA(pLM5578)
79468
79469
79470	repA(pLM5578)
79471	M643p00680(N1011Aplasmid)
79472	M643p00680(N1011Aplasmid)
79473	repA(pLGUG1)
79474
